# Supplementary material for: Neuropsychiatric risk in children with intellectual disability of genetic origin: IMAGINE, a UK national cohort study
Source: PubMed Central journal article supplement (PMC9636306; doi:10.1016/s2215-0366(22)00207-3), 2022-09
Supplement: mmc1.pdf [file mmc1.pdf]

# THE LANCET Psychiatry

## Supplementary appendix

This appendix formed part of the original submission and has been peer reviewed. We post it as supplied by the authors.

Supplement to: Wolstencroft J, Wicks F, Srinivasan R, et al. Neuropsychiatric risk in children with intellectual disability of genetic origin: IMAGINE, a UK national cohort study. *Lancet Psychiatry* 2022; published online August 3. [https://doi.org/10.1016/S2215-0366\(22\)00207-3](https://doi.org/10.1016/S2215-0366(22)00207-3).

## **Appendices**

**Appendix 1:** Genetic data

**Appendix 2:** Supplemental method

**Appendix 3:** IMAGINE Supplemental Medical History Questionnaire

**Appendix 4:** Supplementary Tables and Figures

**Appendix 5:** Data accessibility statement and consortium members

**Appendix 6:** STROBE reporting guidelines

## Appendix 1: Genetic data

**Table 1:** Example of IMAGINE genetic database available for data sharing upon request

| IMAGINE STUDY NUMBER | VARIANT CATEGORY (A= MOST PATHOGENIC) | TYPE OF VARIANT | KARYOTYPE | CHROMOSOME | START     | END       | BROWSER FORMAT           | BAND KARYOTYPE    | GENE CONTENT | SIZE (bp) | CONSEQUENCE | TRANSCRIPT ID   | RefSeq    | CODING SEQUENCE POSITION (c.) | REFERENCE ALLELE | ALTERNATE ALLELE | VARIANT POSITION (p.) | VARIANT AMINO ACID | GENOTYPE     | GENETIC TEST USED    | FISH PROBE    | INHERITANCE    | BUILD TYPE  |
|----------------------|---------------------------------------|-----------------|-----------|------------|-----------|-----------|--------------------------|-------------------|--------------|-----------|-------------|-----------------|-----------|-------------------------------|------------------|------------------|-----------------------|--------------------|--------------|----------------------|---------------|----------------|-------------|
| EG1                  | A                                     | CNV             | 46,XY     | 1          | 10412593  | 10412593  | chr1:1-10412593          | chr1p36.33-p36.22 |              | 10412593  | Deletion    |                 |           |                               |                  |                  |                       |                    |              | Array CGH            |               | De Novo        | GRCh36/hg18 |
| EG2                  | A                                     | CNV             | 46,XY     | 2          | 50775890  | 5094772   | chr2:50775890-50947729   | chr2p16.3         |              | 171840    | Deletion    |                 |           |                               |                  |                  |                       |                    |              | Array CGH            |               | Maternal       | GRCh37/hg19 |
| EG3                  | A                                     | CNV             | 46,XX     | 3          | 166052427 | 1752227   | chr3:166052427-175222778 | chr3q26.1-q26.31  |              | 9170352   | Duplication |                 |           |                               |                  |                  |                       |                    |              | Array CGH            |               | Paternal       | GRCh36/hg18 |
| EG4                  | A                                     | SNV             |           | 5          | 176718986 | 176718986 | chr5:176718986-176718986 | chr5q35.3         | NSD1         |           | Frameshift  | ENST00000439151 | NM_022455 | 6290                          | A                | AA               | 2097                  | K>KfsX14           | Heterozygous | Single gene test     |               | Not determined | GRCh37/hg19 |
| EG5                  | A                                     | SNV             |           | 6          | 33400030  | 33400030  | chr6:33400030-33400030   | chr6p21.32        | SYNGAP1      |           | Splice site | ENST00000646630 | NM_006772 | 387+1                         | G                | C                |                       |                    | Heterozygous | Whole Exome Sequence |               | De Novo        | GRCh37/hg19 |
| EG6                  | A                                     | CNV             | 46,XY     | 9          | 753255    | 4718710   | chr9:753255-4718710      | chr9p24.3-p24.1   |              | 3965456   | Deletion    |                 |           |                               |                  |                  |                       |                    |              | Array CGH            |               | Not determined | GRCh37/hg19 |
| EG7                  | A                                     | SNV             | 46,XY     | 2          | 200245088 | 200245091 | chr2:200245088-200245091 | chr2q33.1         | SATB2        |           | Frameshift  | ENST00000457245 | NM_015265 | 594_595                       | ACC              | A                | 199                   | Q>X                | Heterozygous | Whole Exome Sequence |               | De Novo        | GRCh37/hg19 |
| EG7                  | B                                     | CNV             | 46,XY     | 5          | 329960    | 489020    | chr5:329960-489020       | chr5p15.33        |              | 159061    | Duplication |                 |           |                               |                  |                  |                       |                    |              | Array CGH            |               | Paternal       | GRCh36/hg18 |
| EG8                  | A                                     | CNV             | 46,XY     | 15         | 22765628  | 2308282   | chr15:22765628-23082821  | chr15q11.2        |              | 317194    | Deletion    |                 |           |                               |                  |                  |                       |                    |              | Array CGH            |               | Not determined | GRCh37/hg19 |
| EG9                  | A                                     | SNV             |           | 16         | 89357096  | 89357096  | chr16:89357096-89357096  | chr16q24.3        | ANKRD11      |           | Frameshift  | ENST00000301030 | NM_013275 | 538                           | GG               | G                | 180                   | D>TfsX48           | Heterozygous | Whole Exome Sequence |               | De Novo        | GRCh37/hg19 |
| EG10                 | A                                     | CNV             | 46,XX     | 22         | 22336298  | 22588389  | chr22:22336298-22588389  | chr22q11.22       |              | 252092    | Deletion    |                 |           |                               |                  |                  |                       |                    |              | Array CGH            |               | Maternal       | GRCh37/hg19 |
| EG11                 | A                                     | SNV             | 46,XX     | X          | 41205569  | 41205569  | chrX:41205569-41205569   | chrXp11.4         | DDX3X        |           | Missense    | ENST00000644876 | NM_001356 | 1403                          | G                | A                | 468                   | C>Y                | Heterozygous | Whole Exome Sequence |               | De Novo        | GRCh37/hg19 |
| EG12                 | A                                     | CNV             | 46,XX     | 22         |           |           |                          | chr22q11.2        |              |           | Deletion    |                 |           |                               |                  |                  |                       |                    |              | FISH                 | Vysis HIRA(-) | Not determined |             |

## Appendix 2: Supplemental methods

### Psychometric properties of DAWBA

The Development and Well-Being Assessment (DAWBA) is a validated research instrument <sup>1,2</sup> which has been used both in UK national and international surveys of child psychopathology <sup>3,4,5</sup>. It is available in 26 languages and is available digitally for 20 languages on <https://www.dawba.info>.

The DAWBA is organised into modules and was used to collect information on the child's family environment, caregiver wellbeing, schooling, emotional and behavioural adjustment, and specific mental health diagnoses.

The surveys were rated according to DSM-5 criteria by psychiatrists using the same criteria as the recent national survey on children's mental health. Assessors were blind to the child's genetic condition. A sample of 147 DAWBAs were independently rated by IMAGINE-ID and DAWBA national study assessors. Substantial rates of inter-rater reliability were established ( $\kappa > .67$ ,  $p < .001$ ; See Table2).

**Table2: Development and Well-Being Assessment (DAWBA) IMAGINE-ID and national Study inter-rater reliability (n=147)**

| Diagnosis              | Cohens Kappa | <i>p</i> | Level of Agreement |
|------------------------|--------------|----------|--------------------|
| Any Disorder           | 0.670        | 0.00     | Substantial        |
| Any Emotional Disorder | 0.692        | 0.00     | Substantial        |
| Any Anxiety Disorder   | 0.785        | 0.00     | Substantial        |
| ODD                    | 0.685        | 0.00     | Substantial        |
| ADHD                   | 0.700        | 0.00     | Substantial        |
| ASD                    | 0.798        | 0.00     | Substantial        |

### References:

<sup>1</sup>Goodman, R., Ford, T., Richards, H., Gatward, R., & Meltzer, H. (2000). The Development and Well-Being Assessment: description and initial validation of an integrated assessment of child and adolescent psychopathology. *Journal of child psychology and psychiatry, and allied disciplines*, 41(5), 645–655.

<sup>2</sup>Goodman, A., Heiervang, E., Collishaw, S., & Goodman, R. (2011). The 'DAWBA bands' as an ordered-categorical measure of child mental health: description and validation in British and Norwegian samples. *Social psychiatry and psychiatric epidemiology*, 46(6), 521–532.

<sup>3</sup> Ford, T., Goodman, R., & Meltzer, H. (2003). The British Child and Adolescent Mental Health Survey 1999: the prevalence of DSM-IV disorders. *Journal of the American Academy of Child and Adolescent Psychiatry*, 42(10), 1203–1211. <https://doi.org/10.1097/00004583-200310000-00011>

<sup>4</sup> Heiervang, E., Goodman, A., & Goodman, R. (2008). The Nordic advantage in child mental health: separating health differences from reporting style in a cross-cultural comparison of psychopathology. *Journal of child psychology and psychiatry, and allied disciplines*, 49(6), 678–685. <https://doi.org/10.1111/j.1469-7610.2008.01882.x>

<sup>5</sup> Emerson, E., & Hatton, C. (2007). Mental health of children and adolescents with intellectual disabilities in Britain. *The British journal of psychiatry : the journal of mental science*, 191, 493–499. <https://doi.org/10.1192/bjp.bp.107.038729>

# IMAGINE ID Supplemental Medical Questionnaire

The IMAGINE ID medical questionnaire is a bespoke questionnaire created specifically for the study but with reference to existing medical history questionnaires used in other research studies and in clinical practice. Certain questions are mapped to HPO/SNOMED terms for ease of analysis.

The medical questionnaire includes sections on:

- Ethnicity
- Family structure and history of similar problems
- Parental education and work
- Pregnancy details
- Birth details
- Neonatal development
- Infantile development
- Childhood development
- Current medical problems (by body system)
- Medication
- Current height, weight & head circumference
- Inheritance of genetic variant

[See our online data dictionary for more information:](https://imagine-id.org/wp-content/uploads/2019/04/Online-Data-dictionary-16.04.19-v2.pdf)

<https://imagine-id.org/wp-content/uploads/2019/04/Online-Data-dictionary-16.04.19-v2.pdf>

## Welcome to the IMAGINE ID Medical Questionnaire.

We would like to ask you some more questions about your child's medical history.

The questionnaire looks longer than it is, it should only take **20 minutes** to complete. There are lots of skip rules so you will be able to jump through some of the sections fairly quickly.

### Please provide an answer to all questions

If you have any questions or would prefer to complete this over the phone with us, please contact us on \_\_\_\_\_

#### Section 1. About your child

1. Child's first name \_\_\_\_\_

2. What is your relationship to the child?

- |                                       |                                          |                                                 |
|---------------------------------------|------------------------------------------|-------------------------------------------------|
| <input type="checkbox"/> Birth mother | <input type="checkbox"/> Adoptive mother | <input type="checkbox"/> Other (please specify) |
| <input type="checkbox"/> Birth father | <input type="checkbox"/> Adoptive father | _____                                           |

3. Ethnic background of child

- |                                                          |                                                           |
|----------------------------------------------------------|-----------------------------------------------------------|
| <input type="checkbox"/> White British                   | <input type="checkbox"/> Bangladeshi                      |
| <input type="checkbox"/> White Irish                     | <input type="checkbox"/> Any other Asian background       |
| <input type="checkbox"/> Any other White background      | <input type="checkbox"/> Black or Black British Caribbean |
| <input type="checkbox"/> Mixed White and Black Caribbean | <input type="checkbox"/> Black or Black British African   |
| <input type="checkbox"/> Mixed White and Black African   | <input type="checkbox"/> Any other Black background       |
| <input type="checkbox"/> Mixed White and Asian           | <input type="checkbox"/> Chinese                          |
| <input type="checkbox"/> Any other mixed background      | <input type="checkbox"/> Any other ethnic group           |
| <input type="checkbox"/> Indian                          | <input type="checkbox"/> Unknown                          |
| <input type="checkbox"/> Pakistani                       |                                                           |

4. Ethnic background of birth mother

- |                                                          |                                                           |
|----------------------------------------------------------|-----------------------------------------------------------|
| <input type="checkbox"/> White British                   | <input type="checkbox"/> Bangladeshi                      |
| <input type="checkbox"/> White Irish                     | <input type="checkbox"/> Any other Asian background       |
| <input type="checkbox"/> Any other White background      | <input type="checkbox"/> Black or Black British Caribbean |
| <input type="checkbox"/> Mixed White and Black Caribbean | <input type="checkbox"/> Black or Black British African   |
| <input type="checkbox"/> Mixed White and Black African   | <input type="checkbox"/> Any other Black background       |
| <input type="checkbox"/> Mixed White and Asian           | <input type="checkbox"/> Chinese                          |
| <input type="checkbox"/> Any other mixed background      | <input type="checkbox"/> Any other ethnic group           |
| <input type="checkbox"/> Indian                          | <input type="checkbox"/> Unknown                          |
| <input type="checkbox"/> Pakistani                       |                                                           |

#### 4. Ethnic background of birth father

- |                                                          |                                                           |
|----------------------------------------------------------|-----------------------------------------------------------|
| <input type="checkbox"/> White British                   | <input type="checkbox"/> Bangladeshi                      |
| <input type="checkbox"/> White Irish                     | <input type="checkbox"/> Any other Asian background       |
| <input type="checkbox"/> Any other White background      | <input type="checkbox"/> Black or Black British Caribbean |
| <input type="checkbox"/> Mixed White and Black Caribbean | <input type="checkbox"/> Black or Black British African   |
| <input type="checkbox"/> Mixed White and Black African   | <input type="checkbox"/> Any other Black background       |
| <input type="checkbox"/> Mixed White and Asian           | <input type="checkbox"/> Chinese                          |
| <input type="checkbox"/> Any other mixed background      | <input type="checkbox"/> Any other ethnic group           |
| <input type="checkbox"/> Indian                          | <input type="checkbox"/> Unknown                          |
| <input type="checkbox"/> Pakistani                       |                                                           |

## Section 2. About your family and household

1. How many brothers and sisters does your child have? \_\_\_\_\_

2. Please give the number of full and half brothers and sisters:

Number of full-brothers: \_\_\_\_\_ Number of half-brothers: \_\_\_\_\_

Number of full-sisters: \_\_\_\_\_ Number of half-sisters: \_\_\_\_\_

3. Does anyone else in the family have similar difficulties to your child?

- Yes
- No
- Don't know/unsure

**If yes**, please specify who and what difficulties they have:

4. How many people are in the household (including yourself and child)? \_\_\_\_\_

5. How many children in the household are under 16 (including your child)? \_\_\_\_\_

## Section 3. About the parents' education and work

1. Do you know how old the birth mother was when your child was born?

- Yes, please specify \_\_\_\_\_  
 No

2. Do you know how old the birth father was when your child was born?

- Yes, please specify \_\_\_\_\_  
 No

3. What is the highest educational level of the birth mother?

- |                                                                |                                                                    |
|----------------------------------------------------------------|--------------------------------------------------------------------|
| <input type="checkbox"/> Did not complete compulsory education | <input type="checkbox"/> Higher or postgraduate degree             |
| <input type="checkbox"/> GCSEs or O-levels                     | <input type="checkbox"/> Vocational training, please specify _____ |
| <input type="checkbox"/> A-levels or Highers                   |                                                                    |
| <input type="checkbox"/> University degree                     | <input type="checkbox"/> Not known                                 |

4. What is the highest educational level of the birth father?

- |                                                                |                                                                    |
|----------------------------------------------------------------|--------------------------------------------------------------------|
| <input type="checkbox"/> Did not complete compulsory education | <input type="checkbox"/> Higher or postgraduate degree             |
| <input type="checkbox"/> GCSEs or O-levels                     | <input type="checkbox"/> Vocational training, please specify _____ |
| <input type="checkbox"/> A-levels or Highers                   |                                                                    |
| <input type="checkbox"/> University degree                     | <input type="checkbox"/> Not known                                 |

5. If applicable, what is the highest educational level of the adoptive parents?

6. What type of work does the birth mother do?

- |                                                          |                                                          |
|----------------------------------------------------------|----------------------------------------------------------|
| <input type="checkbox"/> Full time paid employment       | <input type="checkbox"/> Part time training or education |
| <input type="checkbox"/> Part time paid employment       | <input type="checkbox"/> Full-time carer                 |
| <input type="checkbox"/> Currently unemployed            | <input type="checkbox"/> Voluntary work                  |
| <input type="checkbox"/> Full time training or education | <input type="checkbox"/> Not known                       |
| <input type="checkbox"/> Other, please specify _____     |                                                          |

7. What type of work does the birth father do?

- |                                                          |                                                          |
|----------------------------------------------------------|----------------------------------------------------------|
| <input type="checkbox"/> Full time paid employment       | <input type="checkbox"/> Part time training or education |
| <input type="checkbox"/> Part time paid employment       | <input type="checkbox"/> Full-time carer                 |
| <input type="checkbox"/> Currently unemployed            | <input type="checkbox"/> Voluntary work                  |
| <input type="checkbox"/> Full time training or education | <input type="checkbox"/> Not known                       |
| <input type="checkbox"/> Other, please specify _____     |                                                          |

8. If applicable, what type of work do the adoptive parents do?



## Section 4. About the pregnancy

1. Did the birth mother take any of the following in pregnancy? (Please select all that apply)

- Prescribed medication
- Anticonvulsant or antidepressant medication
- Other drugs
- Cigarettes (tobacco)
- Alcohol
- Not known
- None of these**

**If yes** to any medication or other drugs taken during pregnancy, please give more details:

2. Did any of the following occur during pregnancy? (Please select all that apply)

- Maternal diabetes
- Maternal physical illness which needed medical attention
- Maternal mental illness which needed medical attention
- Assisted reproduction
- Multiple pregnancy
- Antenatal bleeding
- Abnormal nuchal translucency
- Abnormal ultrasound
- Abnormal amniocentesis
- Abnormal chorionic villous sampling
- Other (please specify)
- None of these**

**If yes** to any of the above, please give more details: (For multiple pregnancy please specify type and how many are alive. For abnormal nuchal translucency please give measurements if known)

## Section 5. About the birth

1. How many weeks pregnant was the mother when your child was born? \_\_\_\_\_

2. Was the birth caesarean (C-section)?

- Yes
- No
- Don't know/unsure

**If yes**, was this elective or emergency?

- Elective
- Emergency

3. Were there any problems with delivery?

- Yes
- No
- Don't know/unsure

**If yes**, what type of delivery problems?

- Forceps delivery
- Ventouse
- Foetal distress
- Cord around neck
- Other

4. Do you know your child's length at birth?

- Yes (please specify):  
\_\_\_\_\_ Centimetres (cm)      OR      \_\_\_\_\_ Inches (in)
- No

5. Do you know your child's weight at birth?

- Yes (please specify):  
\_\_\_\_\_ Kilograms (kg)      OR      \_\_\_\_\_ Pounds and ounces (lb and oz)
- No

6. Do you know your child's head circumference at birth?

- Yes (please specify):  
\_\_\_\_\_ Centimetres (cm)      OR      \_\_\_\_\_ Inches (in)
- No

## Section 6: About neonatal development (from birth to 4 weeks old)

1. Was your child admitted to SCBU (Special Care Baby Unit) or NICU (Neonatal Intensive Care Unit)?

- Yes  
 No  
 Don't know/unsure

**If yes**, do you know how long they were there for?

- Yes (please specify)  
 \_\_\_\_\_ days    OR    \_\_\_\_\_ weeks    OR    \_\_\_\_\_ months  
 No

2. Did your child have seizures as a newborn?

- Yes  
 No  
 Don't know/unsure

3. Was your child fed through a nasogastric (NG) tube as a newborn?

- Yes  
 No  
 Don't know/unsure

4. Was your child ventilated as a newborn?

- Yes  
 No  
 Don't know/unsure

**If yes**, do you know how long they were they ventilated for?

\_\_\_\_\_     Days     Weeks     Months    OR     Unsure

## Section 7. About your child's infancy

|                                                                                                  | Yes                      | No                       | Don't know/<br>unsure    |
|--------------------------------------------------------------------------------------------------|--------------------------|--------------------------|--------------------------|
| 1. Did your child have decreased tone (were they floppy) as a baby?                              | <input type="checkbox"/> | <input type="checkbox"/> | <input type="checkbox"/> |
| 2. Did your child have increased tone (were they stiff), spasticity or cerebral palsy as a baby? | <input type="checkbox"/> | <input type="checkbox"/> | <input type="checkbox"/> |
| 3. Did your child have severe colic as a baby?                                                   | <input type="checkbox"/> | <input type="checkbox"/> | <input type="checkbox"/> |
| 4. Was your child irritable, miserable or difficult to settle as a baby?                         | <input type="checkbox"/> | <input type="checkbox"/> | <input type="checkbox"/> |
| 5. Was your child lethargic or overly sleepy as a baby?                                          | <input type="checkbox"/> | <input type="checkbox"/> | <input type="checkbox"/> |

## Section 8. About your child's development

1. Did your child have failure to thrive in infancy?

- Yes
- No
- Don't know/unsure

2. Did your child have feeding problems in childhood?

- Yes
- No
- Don't know/unsure

3. Was your child fed with a tube in childhood?

- Yes
- No
- Don't know/unsure

**If yes**, how long were they fed with a tube for?

\_\_\_\_\_  Days  Weeks  Months  Don't know/unsure

4. Did your child have a social smile by 2 months old?

- Yes
- No
- Don't know/unsure

**If no**, at what age did your child have a social smile? (If you're unsure please give your best guess)

\_\_\_\_\_  Weeks  Months  Years

5. Can your child sit independently?

- Yes
- No
- Don't know/unsure

**If yes**, at what age could they do this? (If you're unsure please give your best guess)

\_\_\_\_\_  Weeks  Months  Years

6. Can or could your child crawl?

- Yes
- No
- Don't know/unsure

**If yes**, how can or could they crawl? (please select all that apply)

- Rolling
- Bottom shuffling
- Commando-style
- Hands and knees
- Not known

At what age could they do this? (If you're unsure please give your best guess)

\_\_\_\_\_  Weeks  Months  Years

|                                                     | Yes                      | No                       | If yes, please give the age your child could do this, if you're unsure please give your best guess  |
|-----------------------------------------------------|--------------------------|--------------------------|-----------------------------------------------------------------------------------------------------|
| 7. Can your child walk independently?               | <input type="checkbox"/> | <input type="checkbox"/> | _____ <input type="checkbox"/> Weeks <input type="checkbox"/> Months <input type="checkbox"/> Years |
| 8. Can your child run?                              | <input type="checkbox"/> | <input type="checkbox"/> | _____ <input type="checkbox"/> Weeks <input type="checkbox"/> Months <input type="checkbox"/> Years |
| 9. Can your child hop?                              | <input type="checkbox"/> | <input type="checkbox"/> | _____ <input type="checkbox"/> Weeks <input type="checkbox"/> Months <input type="checkbox"/> Years |
| 10. Can your child ride a bike without stabilizers? | <input type="checkbox"/> | <input type="checkbox"/> | _____ <input type="checkbox"/> Weeks <input type="checkbox"/> Months <input type="checkbox"/> Years |
| 11. Can your child do up buttons?                   | <input type="checkbox"/> | <input type="checkbox"/> | _____ <input type="checkbox"/> Weeks <input type="checkbox"/> Months <input type="checkbox"/> Years |
| 12. Can your child get dressed by themselves?       | <input type="checkbox"/> | <input type="checkbox"/> | _____ <input type="checkbox"/> Weeks <input type="checkbox"/> Months <input type="checkbox"/> Years |
| 13. Does your child have a sense of danger?         | <input type="checkbox"/> | <input type="checkbox"/> |                                                                                                     |
| 14. Can your child speak?                           | <input type="checkbox"/> | <input type="checkbox"/> | _____ <input type="checkbox"/> Weeks <input type="checkbox"/> Months <input type="checkbox"/> Years |

15. What was your child's language level at 4 years old? (Please select one)

- |                                                 |                                                            |
|-------------------------------------------------|------------------------------------------------------------|
| <input type="checkbox"/> No speech and language | <input type="checkbox"/> Enough to communicate their needs |
| <input type="checkbox"/> Minimal (single words) | <input type="checkbox"/> Average for their age             |
| <input type="checkbox"/> Simple sentences       | <input type="checkbox"/> Not known                         |
| <input type="checkbox"/> Slightly delayed       |                                                            |

16. Has your child lost any developmental skills that they used to have?

- Yes  
 No  
 Don't know/unsure

**If yes,** please give detail about any loss of developmental skills:

17. Does your child have a Statement of Special Educational Need or Education and Health Care Plan?

- Yes  
 No

18. Does your child receive a Disability Living Allowance?

- Yes  
 No

**If yes,** please answer the following questions:

18a. What level is the Care component of the Allowance?

- Not eligible     Lowest     Middle     Highest  
 Don't know/unsure

18b. What level is the Mobility component of the Allowance?

- Not eligible     Lowest     Middle     Highest  
 Don't know/unsure

## Section 9. About medical problems your child may have

This section asks about any medical problems your child currently has or has previously had.

- If you answer 'Yes', please continue and answer further questions so that you can give more detail about this.
- If you answer 'No' or 'Don't know/unsure' you can move onto the next question.

1. Has your child ever had any hearing problems?

- Yes
- No
- Don't know/unsure

**If yes**, please tick all that apply:

Do they still have this hearing problem?

|                          |                            | Yes                      | No                       |
|--------------------------|----------------------------|--------------------------|--------------------------|
| <input type="checkbox"/> | Hearing Aid                | <input type="checkbox"/> | <input type="checkbox"/> |
| <input type="checkbox"/> | Glue ear                   | <input type="checkbox"/> | <input type="checkbox"/> |
| <input type="checkbox"/> | Grommets                   | <input type="checkbox"/> | <input type="checkbox"/> |
| <input type="checkbox"/> | Any other hearing problems | <input type="checkbox"/> | <input type="checkbox"/> |

Please give detail about any hearing problems:

2. Has your child ever had any eye problems?

- Yes
- No
- Don't know/unsure

**If yes**, please tick all that apply:

Do they still have this eye problem?

|                          |                        | Yes                      | No                       |
|--------------------------|------------------------|--------------------------|--------------------------|
| <input type="checkbox"/> | Glasses                | <input type="checkbox"/> | <input type="checkbox"/> |
| <input type="checkbox"/> | Squint                 | <input type="checkbox"/> | <input type="checkbox"/> |
| <input type="checkbox"/> | Cataracts              | <input type="checkbox"/> | <input type="checkbox"/> |
| <input type="checkbox"/> | Any other eye problems | <input type="checkbox"/> | <input type="checkbox"/> |

Please give detail about any eye problems:

### 3. Has your child ever had a cleft lip or palate?

- Yes
- No
- Don't know/unsure

**If yes,** please tick all that apply:

|                          |                                                 | Do they still have this problem? |                          |
|--------------------------|-------------------------------------------------|----------------------------------|--------------------------|
|                          |                                                 | Yes                              | No                       |
| <input type="checkbox"/> | Cleft lip                                       | <input type="checkbox"/>         | <input type="checkbox"/> |
| <input type="checkbox"/> | Cleft palate                                    | <input type="checkbox"/>         | <input type="checkbox"/> |
| <input type="checkbox"/> | Difficulty swallowing                           | <input type="checkbox"/>         | <input type="checkbox"/> |
| <input type="checkbox"/> | Speech and language difficulty                  | <input type="checkbox"/>         | <input type="checkbox"/> |
| <input type="checkbox"/> | Any other cleft or speech and language problems | <input type="checkbox"/>         | <input type="checkbox"/> |

Please give detail about any other cleft or speech and language problems:

### 4. Has your child ever had any muscle or movement problems?

- Yes
- No
- Don't know/unsure

**If yes,** please tick all that apply:

|                          |                                       | Do they still have this muscle/movement problem? |                          |
|--------------------------|---------------------------------------|--------------------------------------------------|--------------------------|
|                          |                                       | Yes                                              | No                       |
| <input type="checkbox"/> | Clumsy                                | <input type="checkbox"/>                         | <input type="checkbox"/> |
| <input type="checkbox"/> | Low tone/floppy                       | <input type="checkbox"/>                         | <input type="checkbox"/> |
| <input type="checkbox"/> | High tone/stiff/spasticity            | <input type="checkbox"/>                         | <input type="checkbox"/> |
| <input type="checkbox"/> | Tremor                                | <input type="checkbox"/>                         | <input type="checkbox"/> |
| <input type="checkbox"/> | Ataxia                                | <input type="checkbox"/>                         | <input type="checkbox"/> |
| <input type="checkbox"/> | Dystonia                              | <input type="checkbox"/>                         | <input type="checkbox"/> |
| <input type="checkbox"/> | Fine motor skills problems            | <input type="checkbox"/>                         | <input type="checkbox"/> |
| <input type="checkbox"/> | Cerebral palsy                        | <input type="checkbox"/>                         | <input type="checkbox"/> |
| <input type="checkbox"/> | Any other muscle or movement problems | <input type="checkbox"/>                         | <input type="checkbox"/> |

Please give detail about any other muscle or movement problems:

5. Has your child ever had any brain damage caused by an infection or trauma?

- Yes
- No
- Don't know/unsure

**If yes**, please tick all that apply:

- Meningitis
- Encephalitis
- Head injury
- Any other brain disease

Please give details:

6. Has your child had any brain/MRI/CT/EEG scans?

- Yes
- No
- Don't know/unsure

**If yes**, please tick all that apply:

|                          |                | Was the scan:            |                          |                          |
|--------------------------|----------------|--------------------------|--------------------------|--------------------------|
|                          |                | Normal                   | Abnormal                 | Unsure                   |
| <input type="checkbox"/> | MRI scan       | <input type="checkbox"/> | <input type="checkbox"/> | <input type="checkbox"/> |
| <input type="checkbox"/> | CT scan        | <input type="checkbox"/> | <input type="checkbox"/> | <input type="checkbox"/> |
| <input type="checkbox"/> | EEG            | <input type="checkbox"/> | <input type="checkbox"/> | <input type="checkbox"/> |
| <input type="checkbox"/> | Brain scan     | <input type="checkbox"/> | <input type="checkbox"/> | <input type="checkbox"/> |
| <input type="checkbox"/> | Any other scan | <input type="checkbox"/> | <input type="checkbox"/> | <input type="checkbox"/> |

**If yes to any scans**, please give detail about any other muscle or moment problems:

7. Does your child have a brain malformation or neurodegenerative disease?

- Yes
- No
- Don't know/unsure

**If yes**, please describe if known:



8. Has your child ever had any seizures?

- Yes
- No
- Don't know/unsure

**If yes**, please answer the following:

8a. Are the seizures currently under control?

- Yes
- No
- Don't know/unsure

8b. Please tick all types of seizures that your child has had:

|                          |                                              | Do they still have these seizures? |                          |
|--------------------------|----------------------------------------------|------------------------------------|--------------------------|
|                          |                                              | Yes                                | No                       |
| <input type="checkbox"/> | Febrile seizures                             | <input type="checkbox"/>           | <input type="checkbox"/> |
| <input type="checkbox"/> | Grand mal/generalised tonic clonic seizures  | <input type="checkbox"/>           | <input type="checkbox"/> |
| <input type="checkbox"/> | Petit mal/absence seizures                   | <input type="checkbox"/>           | <input type="checkbox"/> |
| <input type="checkbox"/> | Infantile spasms                             | <input type="checkbox"/>           | <input type="checkbox"/> |
| <input type="checkbox"/> | Atonic/drop attacks                          | <input type="checkbox"/>           | <input type="checkbox"/> |
| <input type="checkbox"/> | Complex partial seizures                     | <input type="checkbox"/>           | <input type="checkbox"/> |
| <input type="checkbox"/> | Simple partial/focal seizures                | <input type="checkbox"/>           | <input type="checkbox"/> |
| <input type="checkbox"/> | Convulsive/non-convulsive status epilepticus | <input type="checkbox"/>           | <input type="checkbox"/> |
| <input type="checkbox"/> | Electrical status epilepticus in sleep       | <input type="checkbox"/>           | <input type="checkbox"/> |
| <input type="checkbox"/> | Unsure of type                               | <input type="checkbox"/>           | <input type="checkbox"/> |
| <input type="checkbox"/> | Any other seizures                           | <input type="checkbox"/>           | <input type="checkbox"/> |

Please give details of any other seizures:

9. Has your child ever had any stomach and/or gut problems?

- Yes
- No
- Don't know/unsure

**If yes,** please tick all that apply:

|                          |                                       | Do they still have these problems? |                          |
|--------------------------|---------------------------------------|------------------------------------|--------------------------|
|                          |                                       | Yes                                | No                       |
| <input type="checkbox"/> | Reflux                                | <input type="checkbox"/>           | <input type="checkbox"/> |
| <input type="checkbox"/> | Severe constipation                   | <input type="checkbox"/>           | <input type="checkbox"/> |
| <input type="checkbox"/> | Gastroschisis                         | <input type="checkbox"/>           | <input type="checkbox"/> |
| <input type="checkbox"/> | Omphalocele                           | <input type="checkbox"/>           | <input type="checkbox"/> |
| <input type="checkbox"/> | Hirschsprung disease                  | <input type="checkbox"/>           | <input type="checkbox"/> |
| <input type="checkbox"/> | Malrotation of the gut                | <input type="checkbox"/>           | <input type="checkbox"/> |
| <input type="checkbox"/> | Tracheoesophageal fistula             | <input type="checkbox"/>           | <input type="checkbox"/> |
| <input type="checkbox"/> | Duodenal atresia                      | <input type="checkbox"/>           | <input type="checkbox"/> |
| <input type="checkbox"/> | Anal atresia                          | <input type="checkbox"/>           | <input type="checkbox"/> |
| <input type="checkbox"/> | Any other stomach and/or gut problems | <input type="checkbox"/>           | <input type="checkbox"/> |

Please give detail about any other stomach and/or gut problems:

10. Has your child ever had any breathing or chest problems?

- Yes
- No
- Don't know/unsure

**If yes,** please tick all that apply:

|                          |                                       | Do they still have these breathing or chest problems? |                          |
|--------------------------|---------------------------------------|-------------------------------------------------------|--------------------------|
|                          |                                       | Yes                                                   | No                       |
| <input type="checkbox"/> | Recurrent chest infections            | <input type="checkbox"/>                              | <input type="checkbox"/> |
| <input type="checkbox"/> | Asthma                                | <input type="checkbox"/>                              | <input type="checkbox"/> |
| <input type="checkbox"/> | Bronchiectasis                        | <input type="checkbox"/>                              | <input type="checkbox"/> |
| <input type="checkbox"/> | Any other breathing or chest problems | <input type="checkbox"/>                              | <input type="checkbox"/> |

Please give detail about any other muscle or moment problems:

11. Has your child ever had any heart problems?

- Yes
- No
- Don't know/unsure

**If yes,** please tick all that apply:

- Congenital structural heart defect
- Heart rhythm disturbance
- Any other heart problem

Please give details:

12. Has your child ever had any kidney problems?

- Yes
- No
- Don't know/unsure

**If yes,** please tick all that apply:

**Do they still have these kidney problems?**

|                          |                                    | Do they still have these kidney problems? |                          |
|--------------------------|------------------------------------|-------------------------------------------|--------------------------|
|                          |                                    | Yes                                       | No                       |
| <input type="checkbox"/> | Urinary reflux                     | <input type="checkbox"/>                  | <input type="checkbox"/> |
| <input type="checkbox"/> | Recurrent urinary tract infections | <input type="checkbox"/>                  | <input type="checkbox"/> |
| <input type="checkbox"/> | Renal cysts                        | <input type="checkbox"/>                  | <input type="checkbox"/> |
| <input type="checkbox"/> | Renal tumors                       | <input type="checkbox"/>                  | <input type="checkbox"/> |
| <input type="checkbox"/> | Abnormal kidney shape              | <input type="checkbox"/>                  | <input type="checkbox"/> |
| <input type="checkbox"/> | Abnormal kidney function           | <input type="checkbox"/>                  | <input type="checkbox"/> |
| <input type="checkbox"/> | Any other kidney problems          | <input type="checkbox"/>                  | <input type="checkbox"/> |

Please give detail about any other kidney problems:

13. Has your child ever had any genital problems?

- Yes
- No
- Don't know/unsure

**If yes,** please tick all that apply:

|                                                     | Do they still have these genital problems? |                          |
|-----------------------------------------------------|--------------------------------------------|--------------------------|
|                                                     | Yes                                        | No                       |
| <input type="checkbox"/> Ambiguous genitalia        | <input type="checkbox"/>                   | <input type="checkbox"/> |
| <input type="checkbox"/> Undescended testes         | <input type="checkbox"/>                   | <input type="checkbox"/> |
| <input type="checkbox"/> Hypospadias                | <input type="checkbox"/>                   | <input type="checkbox"/> |
| <input type="checkbox"/> Any other genital problems | <input type="checkbox"/>                   | <input type="checkbox"/> |

Please give detail about any other genital problems:

14. Has your child ever had any skeletal or bone problems?

- Yes
- No
- Don't know/unsure

**If yes,** please tick all that apply:

|                                                  | Do they still have these skeletal or bone problems? |                          |
|--------------------------------------------------|-----------------------------------------------------|--------------------------|
|                                                  | Yes                                                 | No                       |
| <input type="checkbox"/> Polydactyly             | <input type="checkbox"/>                            | <input type="checkbox"/> |
| <input type="checkbox"/> Abnormal hands          | <input type="checkbox"/>                            | <input type="checkbox"/> |
| <input type="checkbox"/> Abnormal feet           | <input type="checkbox"/>                            | <input type="checkbox"/> |
| <input type="checkbox"/> Vertebral anomalies     | <input type="checkbox"/>                            | <input type="checkbox"/> |
| <input type="checkbox"/> Scoliosis               | <input type="checkbox"/>                            | <input type="checkbox"/> |
| <input type="checkbox"/> Chest wall problems     | <input type="checkbox"/>                            | <input type="checkbox"/> |
| <input type="checkbox"/> Any other bone problems | <input type="checkbox"/>                            | <input type="checkbox"/> |

Please give details about any other bone problems:

15. Has your child ever had any growth or hormone problems?

- Yes
- No
- Don't know/unsure

**If yes,** please tick all that apply:

**Do they still have these growth or hormone problems?**

|                          |                            | Do they still have these growth or hormone problems? |                          |
|--------------------------|----------------------------|------------------------------------------------------|--------------------------|
|                          |                            | Yes                                                  | No                       |
| <input type="checkbox"/> | Short stature              | <input type="checkbox"/>                             | <input type="checkbox"/> |
| <input type="checkbox"/> | Growth hormone deficiency  | <input type="checkbox"/>                             | <input type="checkbox"/> |
| <input type="checkbox"/> | Failure to thrive          | <input type="checkbox"/>                             | <input type="checkbox"/> |
| <input type="checkbox"/> | Early puberty              | <input type="checkbox"/>                             | <input type="checkbox"/> |
| <input type="checkbox"/> | Insulin-dependent diabetes | <input type="checkbox"/>                             | <input type="checkbox"/> |
| <input type="checkbox"/> | Abnormal kidney function   | <input type="checkbox"/>                             | <input type="checkbox"/> |
| <input type="checkbox"/> | Any other hormone problems | <input type="checkbox"/>                             | <input type="checkbox"/> |

Please give detail about any other hormone problems:

16. Has your child gone through puberty? (Please select one)

- Yes
- Currently ongoing
- No
- Don't know/unsure

Please give details:

17. Has your child ever had any sleep problems?

- Yes
- No
- Don't know/unsure

**If yes,** please tick all that apply:

**Do they still have these sleep problems?**

|                          |                                 | Yes                      | No                       |
|--------------------------|---------------------------------|--------------------------|--------------------------|
| <input type="checkbox"/> | Trouble getting to sleep        | <input type="checkbox"/> | <input type="checkbox"/> |
| <input type="checkbox"/> | Early waking                    | <input type="checkbox"/> | <input type="checkbox"/> |
| <input type="checkbox"/> | Multiple interruptions to sleep | <input type="checkbox"/> | <input type="checkbox"/> |
| <input type="checkbox"/> | Insomnia                        | <input type="checkbox"/> | <input type="checkbox"/> |
| <input type="checkbox"/> | Hypersomnia                     | <input type="checkbox"/> | <input type="checkbox"/> |
| <input type="checkbox"/> | Night terrors                   | <input type="checkbox"/> | <input type="checkbox"/> |
| <input type="checkbox"/> | Sleepwalking                    | <input type="checkbox"/> | <input type="checkbox"/> |
| <input type="checkbox"/> | Any other sleep problems        | <input type="checkbox"/> | <input type="checkbox"/> |

Please give detail about any other sleep problems:

18. How many hours does your child normally sleep each night? \_\_\_\_\_

19. If you would like to give any further details of your child's sleep problems, please do so:

20. Has your child ever had any food or eating problems?

- Yes
- No
- Don't know/unsure

**If yes,** please tick all that apply:

**Do they still have these food or eating problems?**

|                          |                                             | Yes                      | No                       |
|--------------------------|---------------------------------------------|--------------------------|--------------------------|
| <input type="checkbox"/> | Binge eating                                | <input type="checkbox"/> | <input type="checkbox"/> |
| <input type="checkbox"/> | Parents need to restrict access to food     | <input type="checkbox"/> | <input type="checkbox"/> |
| <input type="checkbox"/> | Eating non-food items                       | <input type="checkbox"/> | <input type="checkbox"/> |
| <input type="checkbox"/> | Extreme food rituals, habits or preferences | <input type="checkbox"/> | <input type="checkbox"/> |
| <input type="checkbox"/> | Any other food behaviour problems           | <input type="checkbox"/> | <input type="checkbox"/> |

Please give detail about any food or eating problems:

21. Does your child have regular medical/outpatient appointments?

- Yes
- No

**If yes,** what speciality, what is the name of their doctor and which hospital are they seen at?

22. If your child has any other serious medical or dental problems, please let us know:

## Section 10. About any medication your child may take

This section asks about any medication your child is currently taking or has previously taken.

- If you answer 'Yes', please continue to answer further questions so we can learn more about this medication.
- If you answer 'No' or 'Don't know/unsure' you can move onto the next question.

1. Is your child currently taking or have they taken any medication for sleep problems?

- Yes
- No
- Don't know/unsure

**If yes,** please answer the following questions:

1a. Please choose the name of the medication:

- Melatonin/Bio-Melatonin/Circadin
- Promethazine Hydrochloride/ Phenergan
- Zopiclone/Zimovane
- Other, please state \_\_\_\_\_

1b. Are they currently on this medication?

- Yes
- No

1c. How long have they been taking this medication?

- \_\_\_\_\_  Weeks  Months  Years

1d. Did this medication work?

- No
- A little
- A lot
- Don't know/unsure

2. Is your child currently taking or have they taken any medication for anxiety or low mood problems?

- Yes
- No
- Don't know/unsure

**If yes,** please answer the following questions:

2a. Please choose the name of the medication:

- Citalopram Hydrobromide/Cipramil/Citalopram Hydrochloride
- Clomipramine Hydrochloride/Anafranil
- Fluoxetine Hydrochloride/Olena/Oxactin/Prozac/Proxit
- Mirtazapine/Zispin
- Sertraline Hydrochloride/Lustral
- Other, please state \_\_\_\_\_

2b. Are they currently on this medication?

- Yes
- No

2c. How long have they been taking this medication?

- \_\_\_\_\_  Weeks  Months  Years

2d. Did this medication work?

- No
- A little
- A lot
- Don't know/unsure



3. Is your child currently taking or have they taken any medication for behavioural problems (irritation, aggression, agitation)?

- Yes
- No
- Don't know/unsure

**If yes,** please answer the following questions:

3a. Please choose the name of the medication:

- Risperidone/ Risperdal
- Aripiprazole/Abilify
- Olanzapine/Zalasta/Zyprexa/Zypadhera
- Diazepam/Lorazepam
- Fluoxetine Hydrochloride/Sertraline Hydrochloride
- Other, please state \_\_\_\_\_

3b. Are they currently on this medication?

- Yes
- No

3c. How long have they been taking this medication?

\_\_\_\_\_  Weeks  Months  Years

3d. Did this medication work?

- No
- A little
- A lot
- Don't know/unsure

4. Is your child currently taking or have they taken any medication for hyperactivity/ADHD?

- Yes
- No
- Don't know/unsure

**If yes,** please answer the following questions:

4a. Please choose the name of the medication:

- Atomoxetine Hydrochloride/Strattera
- Dexamfetamine Sulfate/Adderall/Dexamfet/Dexedrine
- Methylphenidate HCl/Concerta/Equasym/Matoride/Medikinet/Ritalin/Tranquilyn
- Lisdexamfetamine Dimesylate/Elvanse/Vyvanse
- Other, please state \_\_\_\_\_

4b. Are they currently on this medication?

- Yes
- No

4c. How long have they been taking this medication?

\_\_\_\_\_  Weeks  Months  Years

4d. Did this medication work?

- No
- A little
- A lot
- Don't know/unsure

5. Is your child currently taking or have they taken any medication for tics?

- Yes
- No
- Don't know/unsure

**If yes,** please answer the following questions:

5a. Please choose the name of the medication:

- Risperidone/Risperdal
- Aripiprazole/Abilify
- Clonidine Hydrochloride
- Guanfacine/Intuniv
- Other, please state \_\_\_\_\_

5b. Are they currently on this medication?

- Yes
- No

5c. How long have they been taking this medication?

\_\_\_\_\_  Weeks  Months  Years

5d. Did this medication work?

- No
- A little
- A lot
- Don't know/unsure

6. Is your child currently taking or have they taken any medication for bedwetting problems?

- Yes
- No
- Don't know/unsure

**If yes,** please answer the following questions:

6a. Please choose the name of the medication:

- Desmopressin Acetate/DDAVP
- Imipramine Hydrochloride
- Oxybutynin/Cystrin
- Tolterodine/Efflosomyl
- Other, please state \_\_\_\_\_

6b. Are they currently on this medication?

- Yes
- No

6c. How long have they been taking this medication?

\_\_\_\_\_  Weeks  Months  Years

6d. Did this medication work?

- No
- A little
- A lot
- Don't know/unsure

7. Is your child currently taking or have they taken any medication for seizures?

- Yes
- No
- Don't know/unsure

**If yes,** please answer the following questions:

7a. Please choose the name of the medication:

- Carbamazepine/Carbagen/Epimaz/Tegretol
- Clobazam/Frisium/Tapclob
- Clonazepam/Rivotril
- Eslicarbazepine Acetate/Zebinix
- Ethosuximide/Emeside/Zarontin
- Felbamate/Felbatol/Taloxa
- Gabapentin/Neurontin
- Lacosamide/Vimpat
- Lamotrigine/Lamictal
- Levetiracetam/Desitrend/Keppra/Matever
- Levetiracetam/Desitrend/Keppra/Matever
- Midazolam Hydrochloride/ Buccolam/Midazolam Maleate/Dormicum
- Oxcarbazepine/Trileptal

- Paraldehyde
- Perampanel/Fycompa
- Phenobarbital
- Phenytoin Sodium/Epanutin
- Pregabalin/Lyrica
- Primidone/Mysoline
- Retigabine/Trobalt
- Rufinamide/Inovelon
- Sodium Valporate/Epilim/ Episenta/Epival/Orlept
- Stiripentol/Diacomit
- Sultiame/Ospolot
- Tiagabine/Gabitril
- Topiramate/Topamax
- Valproic Acid/Convulex
- Vigabatrin/Sabril
- Zonisamide/Zonegran
- Other, please state \_\_\_\_\_

7b. Are they currently on this medication?

- Yes
- No

7c. How long have they been taking this medication?

\_\_\_\_\_  Weeks  Months  Years

7d. Did this medication work?

- No
- A little
- A lot
- Don't know/unsure

8. Is your child currently taking or have they taken any other medications?

- Yes
- No
- Don't know/unsure

**If yes,** please answer the following questions:

8a. Please give details about this medication:

8b. Are they currently on this medication?

- Yes
- No

8c. How long have they been taking this medication?

\_\_\_\_\_  Weeks  Months  Years

8d. Did this medication work?

- No
- A little
- A lot
- Don't know/unsure

## Section 11. And finally... about your child now

The next section is about your child now. You can either measure your child now or you can use measurements taken recently - just let us know when the measurements were taken.

1. Do you know your child's height now?

- Yes
- No

**If yes,** please answer the following questions:

1a. What is your child's height now?

\_\_\_\_\_ Feet and inches (ft and in)

OR \_\_\_\_\_ Centimetres (cm)

1b. What date was this measured? Or your best guess.

\_\_\_\_\_

2. Do you know your child's weight now?

- Yes
- No

**If yes,** please answer the following questions:

2a. What is your child's weight now?

\_\_\_\_\_ Kilograms (kg)

OR \_\_\_\_\_ Stone and pounds (st and lb)

OR \_\_\_\_\_ Pounds (lb)

2b. What date was this measured? Or your best guess.

\_\_\_\_\_

3. Do you know your child's head circumference now?

- Yes
- No

**If yes,** please answer the following questions:

3a. What is your child's head circumference now?

\_\_\_\_\_ Inches (in)

OR \_\_\_\_\_ Centimetres (cm)

3b. What date was this measured? Or your best guess.

\_\_\_\_\_

4. It can sometimes be helpful to know how a genetic change happened. Thinking about your child's genetic condition:

- It is new in the family (de novo)
- It is inherited from a parent (familial)
- Parents were not tested
- Don't know/unsure
- Prefer not to say

That's the end of the Medical Questionnaire! Thank you very much for completing this for us, your contribution is hugely valuable and will help other families who are affected by rare genetic conditions.

## Appendix 4: Supplementary Tables and Figures

**Table 3: N numbers for analyses**

| N numbers      | SDQ  | DAWBA          | ABAS | Medical | IMD by household | Documented age of diagnosis |
|----------------|------|----------------|------|---------|------------------|-----------------------------|
| <b>Table 1</b> | 2397 | Diagnoses 2186 | 1238 | 1277    | 2142             | 2349                        |
| <b>Table 3</b> | 1106 | Diagnoses 1021 | 549  | ..      | 961              | 1098                        |

Numbers of completed questionnaires from participants included in analyses

**Table 4: Cross-tabulation of variant type and variant inheritance**

| Inheritance         | familial | de novo | unknown |
|---------------------|----------|---------|---------|
| <b>Variant Type</b> |          |         |         |
| CNV                 | 564      | 541     | 665     |
| SNV                 | 81       | 399     | 147     |

**Table 5: IMD distributions by household**

| IMD Quintile<br>No. (%) | National sample | Recruited cohort<br>N=2476 | Assessment completers<br>N= 2142 |
|-------------------------|-----------------|----------------------------|----------------------------------|
| 1 – most deprived       | 20%             | 536 (21.6)                 | 431 (20.1)                       |
| 2                       | 20%             | 458 (18.5)                 | 406 (19)                         |
| 3                       | 20%             | 471 (19)                   | 407 (19)                         |
| 4                       | 20%             | 477 (19.3)                 | 427 (19.9)                       |
| 5 – least deprived      | 20%             | 534 (21.6)                 | 471 (22)                         |

Of 2770 participants recruited to IMAGINE, IMD scores were available on 2642 individuals from 2476 households. Of the 2397 children for whom measures of mental health are available, postcodes linked to IMD scores were available on 2277 UK participants from 2142 households.

**Table 6: SDQ subscale data (n=2397)**

| SDQ severity band<br>No. (%) | Emotional problems | Conduct problems | Hyperactivity/<br>Inattention problems | Peer problems | Pro-social ability | Impact      |
|------------------------------|--------------------|------------------|----------------------------------------|---------------|--------------------|-------------|
| <b>Close to average</b>      | 929 (38.8)         | 990 (41.3)       | 424 (17.7)                             | 499 (20.8)    | 600 (25)           | 206 (8.6)   |
| <b>Slightly raised</b>       | 284 (11.8)         | 420 (17.5)       | 496 (20.7)                             | 322 (13.4)    | 273 (11.4)         | 112(4.7)    |
| <b>High</b>                  | 509 (21.2)         | 556 (23.2)       | 401 (16.7)                             | 367 (15.3)    | 274 (11.4)         | 145 (6)     |
| <b>Very high</b>             | 675 (28.2)         | 431 (18)         | 1076 (44.9)                            | 1209 (50.4)   | 1250 (52.1)        | 1934 (80.7) |

**Table 7: Difficulties with seizures, epilepsy, muscle and movement problems reported in medical questionnaire (n=1277)**

| Area of difficulty                                            | N (%)      |
|---------------------------------------------------------------|------------|
| <b>Types of seizure (n=355)</b>                               |            |
| Petit mal / Absence seizures                                  | 148 (41.7) |
| Grand mal / Generalised tonic                                 | 120 (33.8) |
| Febrile seizures                                              | 94 (26.5)  |
| Simple partial / focal seizures                               | 57 (16.1)  |
| Any other seizure type                                        | 51 (14.4)  |
| Partial complex seizures                                      | 46 (13)    |
| Atonic / drop attacks                                         | 38 (10.7)  |
| Convulsive / non-convulsive status epilepticus                | 37 (10.4)  |
| Infantile spasms                                              | 22 (6.2)   |
| Electrical status epilepticus in sleep                        | 12 (3.4)   |
| Unsure of seizure type                                        | 69 (19.4)  |
| <b>Number of seizure types (n=355)</b>                        |            |
| 1                                                             | 147 (41.4) |
| 2                                                             | 76 (21.4)  |
| 3                                                             | 33 (9.3)   |
| 4+                                                            | 44 (12.4)  |
| unsure                                                        | 55 (15.5)  |
| <b>Types of muscle problems (n=814)</b>                       |            |
| High tone                                                     | 98 (7)     |
| Low tone                                                      | 492 (3)    |
| Dystonia                                                      | 33 (2.6)   |
| <b>Types of movement &amp; co-ordination problems (n=814)</b> |            |
| Fine motor skill difficulties                                 | 588 (46)   |
| Clumsy                                                        | 432 (33.8) |
| Tremor                                                        | 41 (93)    |
| Ataxia                                                        | 57 (4.5)   |
| Cerebral palsy                                                | 24 (1.9)   |
| <b>Other muscle or movement problems (n=814)</b>              |            |
| Other                                                         | 316 (24.7) |

**Figure 1 : Scatter plot of IMD score and SDQ scores by inheritance in CNV group**

IMD scores were plotted against SDQ scores and grouped by inheritance of the genetic anomaly. Black line (*de novo* inheritance) and dashed line (familial inheritance) do not intersect, indicating that deprivation and variant inheritance independently contributed to behaviour difficulties.

• = de novo variant

o = familial variant

Black line = *de novo* inheritance

Dashed line = familial inheritance

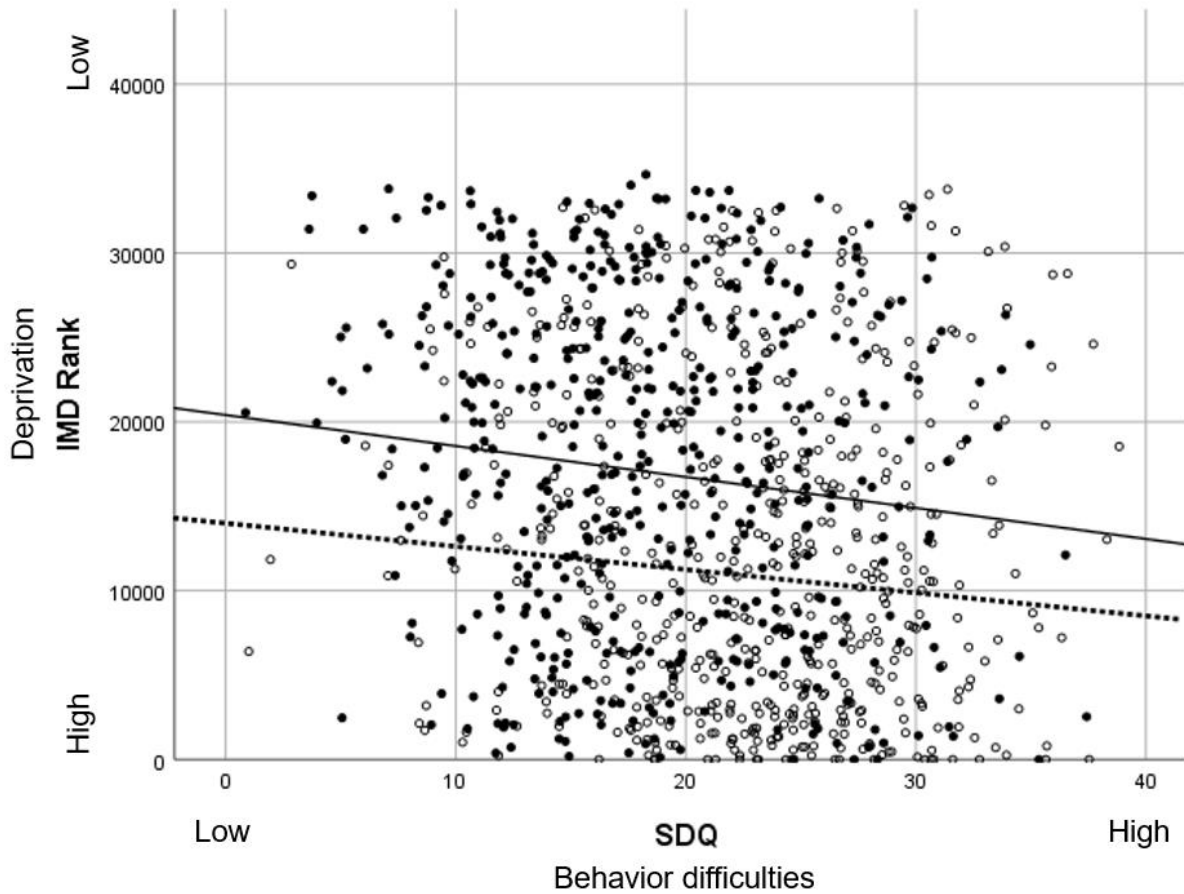



## Appendix 5: IMAGINE Study members

| <b>Surname</b>      | <b>Initials</b> | <b>First Name</b> | <b>Title</b> | <b>Institution</b>                                                           |
|---------------------|-----------------|-------------------|--------------|------------------------------------------------------------------------------|
| <b>Raymond</b>      | F L             | F Lucy            | Professor    | Department of Medical Genetics, University of Cambridge, UK                  |
| <b>Dewhurst</b>     | E               | Eleanor           | Mrs          | Department of Medical Genetics, University of Cambridge, UK                  |
| <b>Lafont</b>       | A               | Amy               | Ms           | Department of Medical Genetics, University of Cambridge, UK                  |
| <b>Timur</b>        | H               | Husniye           | Ms           | Department of Medical Genetics, University of Cambridge, UK                  |
| <b>Wicks</b>        | F               | Francesca         | Mrs          | Department of Medical Genetics, University of Cambridge, UK                  |
| <b>Ye</b>           | Z               | Zheng             | Dr           | Department of Medical Genetics, University of Cambridge, UK                  |
| <b>Baker</b>        | K               | Kate              | Dr           | Department of Medical Genetics, University of Cambridge, UK                  |
| <b>Walker</b>       | N               | Neil              | Dr           | Department of Medical Genetics, University of Cambridge, UK                  |
| <b>Wallwork</b>     | S               | Sarah             | Ms           | Department of Medical Genetics, University of Cambridge, UK                  |
| <b>Skuse</b>        | D               | David             | Professor    | Great Ormond Street Institute of Child Health, University College London, UK |
| <b>Denaxas</b>      | S               | Spiros            | Dr           | Institute of Health Informatics, University College London, London, UK       |
| <b>Mandy</b>        | W               | William           | Dr           | Division of Psychology & Language Sciences, University College London, UK    |
| <b>Wolstencroft</b> | J               | Jeanne            | Dr           | Great Ormond Street Institute of Child Health, University College London, UK |
| <b>Davies</b>       | S               | Sarah             | Ms           | Great Ormond Street Institute of Child Health, University College London, UK |
| <b>Erwood</b>       | M               | Marie             | Ms           | Great Ormond Street Institute of Child Health, University College London, UK |
| <b>Juj</b>          | M               | Manoj             | Mr           | Great Ormond Street Institute of Child Health, University College London, UK |
| <b>Kerry</b>        | E               | Eleanor           | Ms           | Great Ormond Street Institute of Child Health, University College London, UK |
| <b>Lucock</b>       | A               | Anna              | Ms           | Great Ormond Street Institute of Child Health, University College London, UK |
| <b>Printzlau</b>    | F               | Frida             | Ms           | Great Ormond Street Institute of Child Health, University College London, UK |

|                     |      |            |               |                                                                                                                                              |
|---------------------|------|------------|---------------|----------------------------------------------------------------------------------------------------------------------------------------------|
| <b>Srinivasan</b>   | R    | Ramya      | Dr            | Great Ormond Street Institute of Child Health, University College London, UK                                                                 |
| <b>Walker</b>       | S    | Susan      | Dr            | Great Ormond Street Institute of Child Health, University College London, UK                                                                 |
| <b>Watkins</b>      | A    | Alice      | Ms            | Great Ormond Street Institute of Child Health, University College London, UK                                                                 |
| <b>Coscini</b>      | N    | Nadia      | Dr            | Great Ormond Street Institute of Child Health, University College London, UK                                                                 |
| <b>Fatih</b>        | N    | Nasrtullah | Mr            | Great Ormond Street Institute of Child Health, University College London, UK                                                                 |
| <b>Nayana</b>       | L    | Lahiri     | Ms            | Great Ormond Street Institute of Child Health, University College London, UK                                                                 |
| <b>Denyer</b>       | H    | Hayley     | Ms            | Great Ormond Street Institute of Child Health, University College London, UK                                                                 |
| <b>Andrews</b>      | S    | Sophie     | Ms            | MRC Centre for Neuropsychiatric Genetics and Genomics, Division of Psychological Medicine and Clinical Neurosciences, Cardiff University, UK |
| <b>Chawner</b>      | SJRA | Samuel     | Dr            | MRC Centre for Neuropsychiatric Genetics and Genomics, Division of Psychological Medicine and Clinical Neurosciences, Cardiff University, UK |
| <b>Cuthbert</b>     | A    | Andrew     | Dr            | MRC Centre for Neuropsychiatric Genetics and Genomics, Division of Psychological Medicine and Clinical Neurosciences, Cardiff University, UK |
| <b>Challenger</b>   | A    | Aimee      | Ms            | MRC Centre for Neuropsychiatric Genetics and Genomics, Division of Psychological Medicine and Clinical Neurosciences, Cardiff University, UK |
| <b>Hall</b>         | J    | Jeremy     | Professor     | MRC Centre for Neuropsychiatric Genetics and Genomics, Division of Psychological Medicine and Clinical Neurosciences, Cardiff University, UK |
| <b>Lewis</b>        | N    | Nicola     | Ms            | MRC Centre for Neuropsychiatric Genetics and Genomics, Division of Psychological Medicine and Clinical Neurosciences, Cardiff University, UK |
| <b>Owen</b>         | MJ   | Michael    | Professor Sir | MRC Centre for Neuropsychiatric Genetics and Genomics, Division of Psychological Medicine and Clinical Neurosciences, Cardiff University, UK |
| <b>Ray</b>          | S    | Sinead     | Ms            | MRC Centre for Neuropsychiatric Genetics and Genomics, Division of Psychological Medicine and Clinical Neurosciences, Cardiff University, UK |
| <b>Sopp</b>         | M    | Matthew    | Mr            | MRC Centre for Neuropsychiatric Genetics and Genomics, Division of Psychological Medicine and Clinical Neurosciences, Cardiff University, UK |
| <b>Moss</b>         | H    | Hayley     | Ms            | MRC Centre for Neuropsychiatric Genetics and Genomics, Division of Psychological Medicine and Clinical Neurosciences, Cardiff University, UK |
| <b>van den Bree</b> | MBM  | Marianne   | Professor     | MRC Centre for Neuropsychiatric Genetics and Genomics, Division of Psychological Medicine and Clinical Neurosciences, Cardiff University, UK |

|                     |   |          |           |                                                                                                                                              |
|---------------------|---|----------|-----------|----------------------------------------------------------------------------------------------------------------------------------------------|
| <b>Holmans</b>      | P | Peter    | Professor | MRC Centre for Neuropsychiatric Genetics and Genomics, Division of Psychological Medicine and Clinical Neurosciences, Cardiff University, UK |
| <b>Bowen</b>        | S | Samantha | Ms        | MRC Centre for Neuropsychiatric Genetics and Genomics, Division of Psychological Medicine and Clinical Neurosciences, Cardiff University, UK |
| <b>Bradley</b>      | K | Karen    | Mrs       | MRC Centre for Neuropsychiatric Genetics and Genomics, Division of Psychological Medicine and Clinical Neurosciences, Cardiff University, UK |
| <b>Birch</b>        | B | Philippa | Ms        | MRC Centre for Neuropsychiatric Genetics and Genomics, Division of Psychological Medicine and Clinical Neurosciences, Cardiff University, UK |
| <b>Tong</b>         | M | Molly    | Ms        | MRC Centre for Neuropsychiatric Genetics and Genomics, Division of Psychological Medicine and Clinical Neurosciences, Cardiff University, UK |
| <b>Ford</b>         | T | Tasmin   | Professor | Department of Psychiatry, University of Cambridge                                                                                            |
| <b>Searle</b>       | B | Beverly  | Dr        | Unique Charity, UK                                                                                                                           |
| <b>Wynn</b>         | S | Sarah    | Dr        | Unique Charity, UK                                                                                                                           |
| <b>Robertson</b>    | L | Lisa     | Dr        | Aberdeen Royal Infirmary Genetics Service                                                                                                    |
| <b>Berg</b>         | J | Jonathan | Dr        | Ninewells Hospital Dundee Genetics Service                                                                                                   |
| <b>Lampe</b>        | A | Anne     | Professor | Western General Hospital Edinburgh Genetics Service                                                                                          |
| <b>Joss</b>         | S | Shelagh  | Dr        | Glasgow Genetics Centre, Glasgow                                                                                                             |
| <b>Brennan</b>      | P | Paul     | Dr        | Northern Genetics Service, Newcastle                                                                                                         |
| <b>Kraus</b>        | A | Alison   | Dr        | Yorkshire Regional Genetics Service - Clinical Genetics                                                                                      |
| <b>Weber</b>        | A | Astrid   | Dr        | Cheshire & Merseyside Regional Genetic Service                                                                                               |
| <b>Rawson</b>       | M | Myfanwy  | Ms        | Manchester Centre for Genomic Medicine                                                                                                       |
| <b>Quarrell</b>     | O | Oliver   | Dr        | Sheffield Genetic Services                                                                                                                   |
| <b>Vasudevan</b>    | P | Pradeep  | Dr        | Leicestershire Genetics Centre, Leicester                                                                                                    |
| <b>Harrison</b>     | R | Rachel   | Dr        | Nottingham Regional Genetics Service                                                                                                         |
| <b>Williams</b>     | D | Denise   | Dr        | West Midlands Regional Genetics Service, Birmingham                                                                                          |
| <b>Maher</b>        | E | Eamonn   | Professor | East Anglian Medical Genetics Service, Cambridge                                                                                             |
| <b>Kini</b>         | U | Usha     | Dr        | Oxford Genetics Service                                                                                                                      |
| <b>Clowes</b>       | V | Virginia | Dr        | London North West Thames Regional Genetics Service                                                                                           |
| <b>Van Dijk</b>     | F | Fleur    | Dr        | London North West Thames Regional Genetics Service                                                                                           |
| <b>Gurasashvili</b> | J | Jana     | Dr        | London North East Thames Regional Genetics Service - Great Ormond Street Hospital, London                                                    |
| <b>Mansour</b>      | S | Sahar    | Dr        | London South West Thames Regional Genetics Service, St Georges Hospital, Tooting, London                                                     |

|                         |   |        |    |                                                                              |
|-------------------------|---|--------|----|------------------------------------------------------------------------------|
| <b>Holder-Espinasse</b> | M | Muriel | Dr | London South East Thames Regional Genetics Service<br>Guy's Hospital, London |
| <b>Watford</b>          | A | Amy    | Dr | Bristol Clinical Genetics Service, Bristol                                   |
| <b>Rankin</b>           | J | Julia  | Dr | Peninsula Genetics Service, Exeter                                           |
| <b>Baralle</b>          | D | Diana  | Dr | Wessex Clinical Genetics Service                                             |
| <b>Procter</b>          | A | Annie  | Dr | All Wales Regional Genetics Service                                          |

## Appendix 6: STROBE reporting guidelines

|                              | Item No | Recommendation                                                                                                                                                                                                                                                | Page No               |
|------------------------------|---------|---------------------------------------------------------------------------------------------------------------------------------------------------------------------------------------------------------------------------------------------------------------|-----------------------|
| <b>Title and abstract</b>    | 1       | (a) Indicate the study's design with a commonly used term in the title or the abstract                                                                                                                                                                        | 1                     |
|                              |         | (b) Provide in the abstract an informative and balanced summary of what was done and what was found                                                                                                                                                           | 1                     |
| <b>Introduction</b>          |         |                                                                                                                                                                                                                                                               |                       |
| Background/rationale         | 2       | Explain the scientific background and rationale for the investigation being reported                                                                                                                                                                          | 1-2                   |
| Objectives                   | 3       | State specific objectives, including any prespecified hypotheses                                                                                                                                                                                              | 1-2                   |
| <b>Methods</b>               |         |                                                                                                                                                                                                                                                               |                       |
| Study design                 | 4       | Present key elements of study design early in the paper                                                                                                                                                                                                       | 2-4                   |
| Setting                      | 5       | Describe the setting, locations, and relevant dates, including periods of recruitment, exposure, follow-up, and data collection                                                                                                                               | 2-4                   |
| Participants                 | 6       | (a) Give the eligibility criteria, and the sources and methods of selection of participants. Describe methods of follow-up                                                                                                                                    | 2                     |
|                              |         | (b) For matched studies, give matching criteria and number of exposed and unexposed                                                                                                                                                                           | N/A                   |
| Variables                    | 7       | Clearly define all outcomes, exposures, predictors, potential confounders, and effect modifiers. Give diagnostic criteria, if applicable                                                                                                                      | 3-4                   |
| Data sources/<br>measurement | 8*      | For each variable of interest, give sources of data and details of methods of assessment (measurement). Describe comparability of assessment methods if there is more than one group                                                                          | 3-4,<br>Appendix      |
| Bias                         | 9       | Describe any efforts to address potential sources of bias                                                                                                                                                                                                     | 9-9                   |
| Study size                   | 10      | Explain how the study size was arrived at                                                                                                                                                                                                                     | Figure 1              |
| Quantitative variables       | 11      | Explain how quantitative variables were handled in the analyses. If applicable, describe which groupings were chosen and why                                                                                                                                  | N/A                   |
| Statistical methods          | 12      | (a) Describe all statistical methods, including those used to control for confounding                                                                                                                                                                         | 4-5                   |
|                              |         | (b) Describe any methods used to examine subgroups and interactions                                                                                                                                                                                           | 4-5                   |
|                              |         | (c) Explain how missing data were addressed                                                                                                                                                                                                                   | Figure 1,<br>Appendix |
|                              |         | (d) If applicable, explain how loss to follow-up was addressed                                                                                                                                                                                                | N/A                   |
|                              |         | (e) Describe any sensitivity analyses                                                                                                                                                                                                                         | Appendix              |
| <b>Results</b>               |         |                                                                                                                                                                                                                                                               |                       |
| Participants                 | 13*     | (a) Report numbers of individuals at each stage of study—eg numbers potentially eligible, examined for eligibility, confirmed eligible, included in the study, completing follow-up, and analysed<br><br>(b) Give reasons for non-participation at each stage | Figure 1              |

|                          |        |                                                                                                                                                                                                                                                                                                                                                                                                                       |                                    |
|--------------------------|--------|-----------------------------------------------------------------------------------------------------------------------------------------------------------------------------------------------------------------------------------------------------------------------------------------------------------------------------------------------------------------------------------------------------------------------|------------------------------------|
|                          |        | (c) Consider use of a flow diagram                                                                                                                                                                                                                                                                                                                                                                                    |                                    |
| Descriptive data         | 14*    | (a) Give characteristics of study participants (eg demographic, clinical, social) and information on exposures and potential confounders<br><br>(b) Indicate number of participants with missing data for each variable of interest<br><br>(c) Summarise follow-up time (eg, average and total amount)                                                                                                                | Table 1<br><br>Appendix<br><br>N/A |
| Outcome data             | 15*    | Report numbers of outcome events or summary measures over time                                                                                                                                                                                                                                                                                                                                                        | N/A                                |
| <b>Discussion</b>        |        |                                                                                                                                                                                                                                                                                                                                                                                                                       |                                    |
| Main results             | 1<br>6 | (a) Give unadjusted estimates and, if applicable, confounder-adjusted estimates and their precision (eg, 95% confidence interval). Make clear which confounders were adjusted for and why they were included<br><br>(b) Report category boundaries when continuous variables were categorized<br><br>(c) If relevant, consider translating estimates of relative risk into absolute risk for a meaningful time period | 5-7<br><br>5-7<br><br>N/A          |
| Other analyses           | 1<br>7 | Report other analyses done—eg analyses of subgroups and interactions, and sensitivity analyses                                                                                                                                                                                                                                                                                                                        | Appendix                           |
| Key results              | 1<br>8 | Summarise key results with reference to study objectives                                                                                                                                                                                                                                                                                                                                                              | 3                                  |
| Limitations              | 1<br>9 | Discuss limitations of the study, taking into account sources of potential bias or imprecision. Discuss both direction and magnitude of any potential bias                                                                                                                                                                                                                                                            | 9                                  |
| Interpretation           | 2<br>0 | Give a cautious overall interpretation of results considering objectives, limitations, multiplicity of analyses, results from similar studies, and other relevant evidence                                                                                                                                                                                                                                            | 8-9                                |
| Generalisability         | 2<br>1 | Discuss the generalisability (external validity) of the study results                                                                                                                                                                                                                                                                                                                                                 | 8-9                                |
| <b>Other information</b> |        |                                                                                                                                                                                                                                                                                                                                                                                                                       |                                    |
| Funding                  | 2<br>2 | Give the source of funding and the role of the funders for the present study and, if applicable, for the original study on which the present article is based                                                                                                                                                                                                                                                         | 5                                  |
